# Supplementary material for: The Biogeography of Putative Microbial Antibiotic Production
Source: PubMed Central journal article supplement (PMC4478008; doi:10.1371/journal.pone.0130659), 2015-06-23

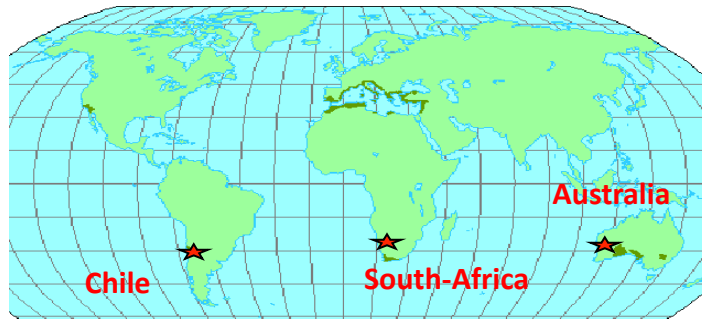

**Chile**

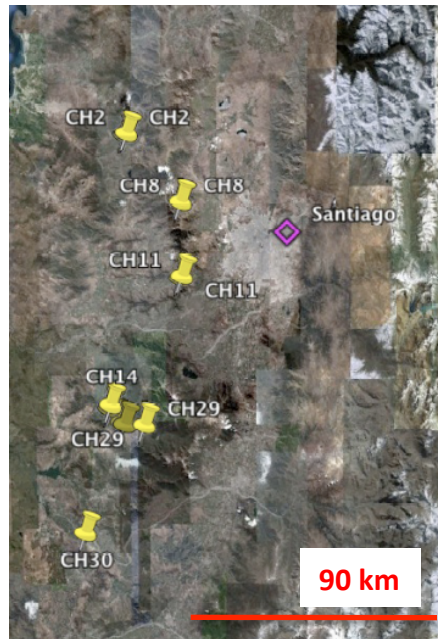

**South-Africa**

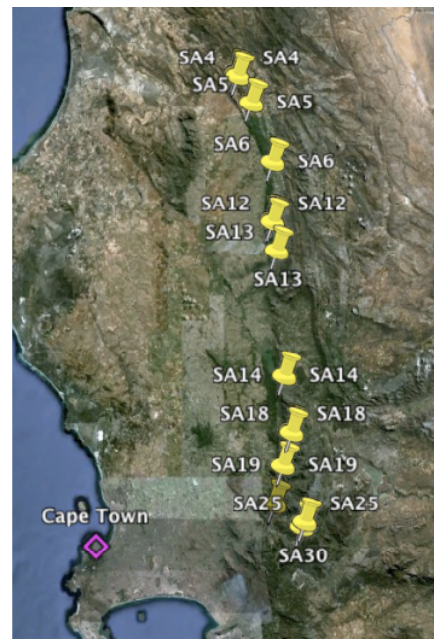

**Australia**

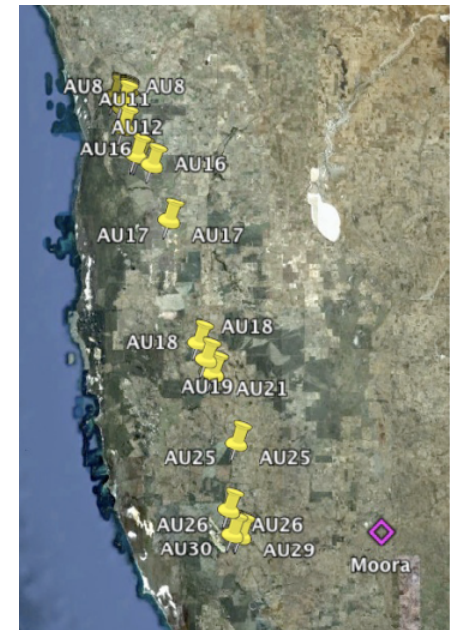

Supplement: pone.0130659.s001.pdf [file pone.0130659.s001.pdf]
