# Supplementary material for: The Biogeography of Putative Microbial Antibiotic Production
Source: PubMed Central journal article supplement (PMC4478008; doi:10.1371/journal.pone.0130659), 2015-06-23
Supplement: pone.0130659.s010.pdf [file pone.0130659.s010.pdf]

| accession # | polyketide       | chemotype     | chain<br>length | first<br>cyclization | priming<br>unit       | location  |
|-------------|------------------|---------------|-----------------|----------------------|-----------------------|-----------|
| AB524586    | hatomarubroigin  | angucycline   | C20             | C7-C12               | acetyl CoA            | unknown   |
| AF126429    | jadomycin        | angucycline   | C20             | C7-C12               | acetyl CoA            | Venezuela |
| AF080235    | landomycin A     | angucycline   | C20             | C7-C12               | acetyl CoA            | unknown   |
| AJ632203    | oviedomycin      | angucycline   | C20             | C7-C12               | acetyl CoA            | unknown   |
| AY228176S1  | PD-116740        | angucycline   | C20             | C7-C12               | acetyl CoA            | unknown   |
| FJ670504    | saquayamycin Z   | angucycline   | C20             | C7-C12               | acetyl CoA            | Romania   |
| AJ628018    | sch 47554        | angucycline   | C20             | C7-C12               | acetyl CoA            | Canada    |
| AF324838    | simocyclinone-D8 | angucycline   | C20             | C7-C12               | acetyl CoA            | unknown   |
| X87093      | urdamycin        | angucycline   | C20             | C7-C12               | acetyl CoA            | Tanzania  |
| HQ828984    | landomycin E     | angucycline   | C20             | C7-C12               | acetyl CoA            | Arizona   |
| GU134622    | azicemicin A     | angucycline   | C20             | C7-C12               | aziridine<br>carboxyl | unknown   |
| DQ915964    | aranciamycin     | anthracycline | C20             | C7-C12               | acetyl CoA            | unknown   |

|            |                |               |             |        |               |         |
|------------|----------------|---------------|-------------|--------|---------------|---------|
| AJ224512   | nogalamycin    | anthracycline | C20         | C7-C12 | acetyl CoA    | unknown |
| AB024979   | steffimycin    | anthracycline | C20         | C7-C12 | acetyl CoA    | unknown |
| AM156932   | steffimycin    | anthracycline | C20         | C7-C12 | acetyl CoA    | unknown |
| AF257324   | aclacinomycin  | anthracycline | C21         | C7-C12 | propionyl CoA | Germany |
| AB024971   | aclacinomycin  | anthracycline | C21         | C7-C12 | propionyl CoA | Germany |
| AB008466   | aklavinone     | anthracycline | C21         | C7-C12 | propionyl CoA | Germany |
| AB024972   | ciclacidine    | anthracycline | C21         | C7-C12 | propionyl CoA | unknown |
| DQ280500   | cosmomycin     | anthracycline | C21         | C7-C12 | propionyl CoA | Brazil  |
| STMDAUABCE | daunomycin     | anthracycline | C21         | C7-C12 | propionyl CoA | unknown |
| STMDNRDPS  | daunomycin     | anthracycline | C21         | C7-C12 | propionyl CoA | unknown |
| AB024974   | rhodomycin     | anthracycline | C21         | C7-C12 | propionyl CoA | unknown |
| AF293442   | R1128          | anthraquinone | C18-<br>C20 | C7-C12 | C3-C5 alkyl   | unknown |
| AJ578458   | chromomycin A3 | aureolic acid | C20         | C7-C12 | acetyl CoA    | Japan   |
| X89899     | mithramycin    | aureolic acid | C20         | C7-C12 | acetyl CoA    | unknown |
| HQ828986   | UT-X26         | aureolic acid | C20         | C7-C12 | acetyl CoA    | Utah    |

|          |                  |                    |     |        |               |            |
|----------|------------------|--------------------|-----|--------|---------------|------------|
| FN565166 | chrysomycin      | gilvocarcin        | C20 | C7-C12 | acetyl CoA    | unknown    |
| AY233211 | gilvocarcin      | gilvocarcin        | C21 | C7-C12 | propionyl CoA | unknown    |
| FN565485 | ravidomycin      | gilvocarcin        | C21 | C7-C12 | propionyl CoA | unknown    |
| SERDNABP | actinorhodin     | isochromanequinone | C16 | C7-C12 | acetyl CoA    | unknown    |
| X63449   | actinorhodin     | isochromanequinone | C16 | C7-C12 | acetyl CoA    | unknown    |
| AL939122 | actinorhodin     | isochromanequinone | C16 | C7-C12 | acetyl CoA    | unknown    |
| X16144   | granaticin       | isochromanequinone | C16 | C7-C12 | acetyl CoA    | California |
| X16300   | granaticin       | isochromanequinone | C16 | C7-C12 | acetyl CoA    | California |
| AJ011500 | granaticin       | isochromanequinone | C16 | C7-C12 | acetyl CoA    | California |
| GU233672 | granaticin       | isochromanequinone | C16 | C7-C12 | acetyl CoA    | Vietnam    |
| AB103463 | medermycin       | isochromanequinone | C16 | C7-C12 | acetyl CoA    | unknown    |
| AF098965 | naphthocyclinone | isochromanequinone | C16 | C7-C12 | acetyl CoA    | Illinois   |
| EU852062 | alnumycin        | isochromanequinone | C18 | C7-C12 | butyryl CoA   | Finland    |
| AF058302 | frenolicin       | isochromanequinone | C18 | C7-C12 | butyryl CoA   | unknown    |
| STMFPS   | frenolicin       | isochromanequinone | C18 | C7-C12 | butyryl CoA   | unknown    |
| X77865   | griseusin        | isochromanequinone | C20 | C7-C12 | unknown       | Peru       |

|            |                |                        |     |        |                |                |
|------------|----------------|------------------------|-----|--------|----------------|----------------|
| FJ719113   | erdacin        | erdacin                | C16 | C7-C12 | acetyl CoA     | Utah           |
| AJ786382   | chartreusin    | chartreusin            | C20 | C7-C12 | acetyl CoA     | unknown        |
| AY228174S2 | kinamycin      | kinamycin              | C20 | C7-C12 | acetyl CoA     | unknown        |
| FJ483966   | polyketomycin  | polyketomycin          | C20 | C7-C12 | acetyl CoA     | unknown        |
| AJ585192   | resistomycin   | resistomycin           | C20 | C9-C14 | acetyl CoA     | unknown        |
| HM193369   | fluostatin     | fluostatin             | C20 | C7-C12 | acetyl CoA     | California     |
| EU147299   | lactonamycin   | lactonamycin           | C20 | C9-C14 | glycine        | United Kingdom |
| EU147298   | lactonamycin   | lactonamycin           | C20 | C9-C14 | glycine        | Japan          |
| AF254925   | enterocin      | enterocin              | C21 | C7-C12 | benzoic acid   | Hawaii         |
| AY196994   | hedamycin      | hedamycin              | C24 | C7-C12 | hexadienyl CoA | California     |
| GU937384   | A-74528        | A-74528                | C30 | C9-C14 | hexadienyl CoA | unknown        |
| AF525490   | fredericamycin | pentangular polyphenol | C30 | C9-C14 | hexadienyl CoA | unknown        |

|          |                  |                           |     |        |              |                    |
|----------|------------------|---------------------------|-----|--------|--------------|--------------------|
| D87924   | pradimicin       | pentangular<br>polyphenol | C24 | C9-C14 | acetyl CoA   | Fiji islands       |
| AB019690 | pradimicin       | pentangular<br>polyphenol | C24 | C9-C14 | acetyl CoA   | Japan              |
| EF151801 | pradimicin       | pentangular<br>polyphenol | C24 | C9-C14 | acetyl CoA   | Fiji islands       |
| AF293355 | rubroromycin     | pentangular<br>polyphenol | C26 | C9-C14 | acetyl CoA   | unknown            |
| AF509565 | griseorhodin A   | pentangular<br>polyphenol | C26 | C9-C14 | acetyl CoA   | unknown,<br>marine |
| HQ828985 | AZ154            | pentangular<br>polyphenol | C26 | C9-C14 | acetyl CoA   | Arizona            |
| AM501485 | benastatin A     | pentangular<br>polyphenol | C28 | C9-C14 | hexanoyl CoA | unknown            |
| AM900040 | elloramycin      | tetracenomycin            | C20 | C9-C14 | acetyl CoA   | unknown            |
| STMTCREP | tetracenomycin C | tetracenomycin            | C20 | C9-C14 | acetyl CoA   | unknown            |

|          |                    |                |     |        |                            |          |
|----------|--------------------|----------------|-----|--------|----------------------------|----------|
| X15312   | tetracenomycin C   | tetracenomycin | C20 | C9-C14 | acetyl CoA                 | unknown  |
| AJ630301 | cervimycin         | tetracycline   | C19 | C7-C12 | malonamyl<br>CoA           | France   |
| AB039379 | chlorotetracycline | tetracycline   | C19 | C7-C12 | malonamyl<br>CoA           | Missouri |
| Z25538   | oxytetracycline    | tetracycline   | C19 | C7-C12 | malonamyl<br>CoA           | unkown   |
| DQ143963 | oxytetracycline    | tetracycline   | C19 | C7-C12 | malonamyl<br>CoA           | unkown   |
| GQ409537 | SF2575             | tetracycline   | C19 | C7-C12 | malonamyl<br>CoA           | Japan    |
| AM492533 | lysolipin          | xanthone       | C24 | C9-C14 | malonamyl<br>CoA or acetyl | France   |
| AB469194 | FD-594             | xanthone       | C28 | C9-C14 | butyryl coA                | unkown   |
| AB024980 | spore pigment      | spore pigment  | -   | -      | -                          | -        |
| X62518   | spore pigment      | spore pigment  | -   | -      | -                          | -        |

|            |               |               |   |   |   |   |
|------------|---------------|---------------|---|---|---|---|
| X55942     | spore pigment | spore pigment | - | - | - | - |
| AB024981   | spore pigment | spore pigment | - | - | - | - |
| AY485223   | spore pigment | spore pigment | - | - | - | - |
| STMHYDROXY | spore pigment | spore pigment | - | - | - | - |
| AF293354   | spore pigment | spore pigment | - | - | - | - |
| EG10274    | outgroup      | outgroup      | - | - | - | - |
